# Supplementary material
Source: PubMed Central journal article supplement (PMC2781677)

**A**

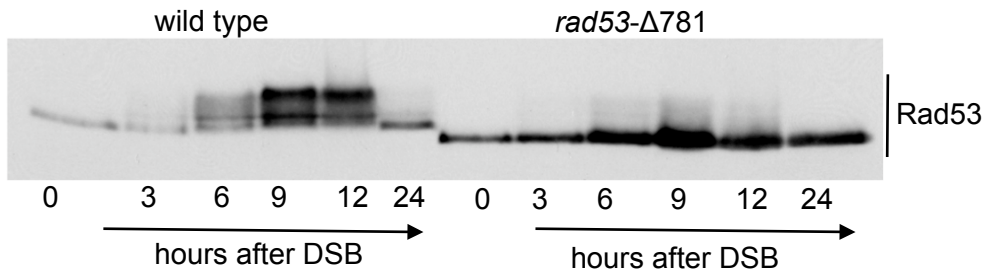

**B**

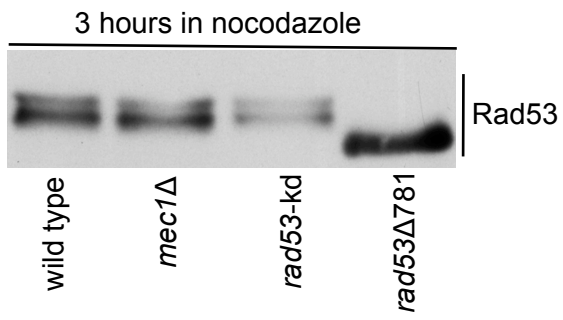

Supplement: supp_M109.048157_jbc.M109.048157-1.pdf [file supp_M109.048157_jbc.M109.048157-1.pdf]
